# Supplementary material
Source: Springer Nature journal article supplement (https://www.springermedizin.de/resource/supplementary/12879_2012_2302_MOESM1_ESM.pdf/9445488)

M 1 2 3 4 5 6 7 8 9 10 M

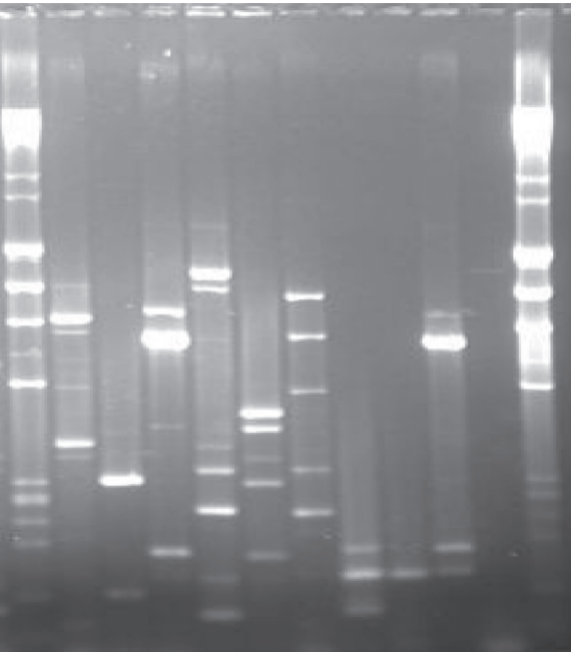

Supplement: MOESM1 [file 9445488]
